# Supplementary material
Source: Springer Nature journal article supplement (https://www.springermedizin.de/resource/supplementary/12877_2010_602_MOESM1_ESM.pdf/9439950)

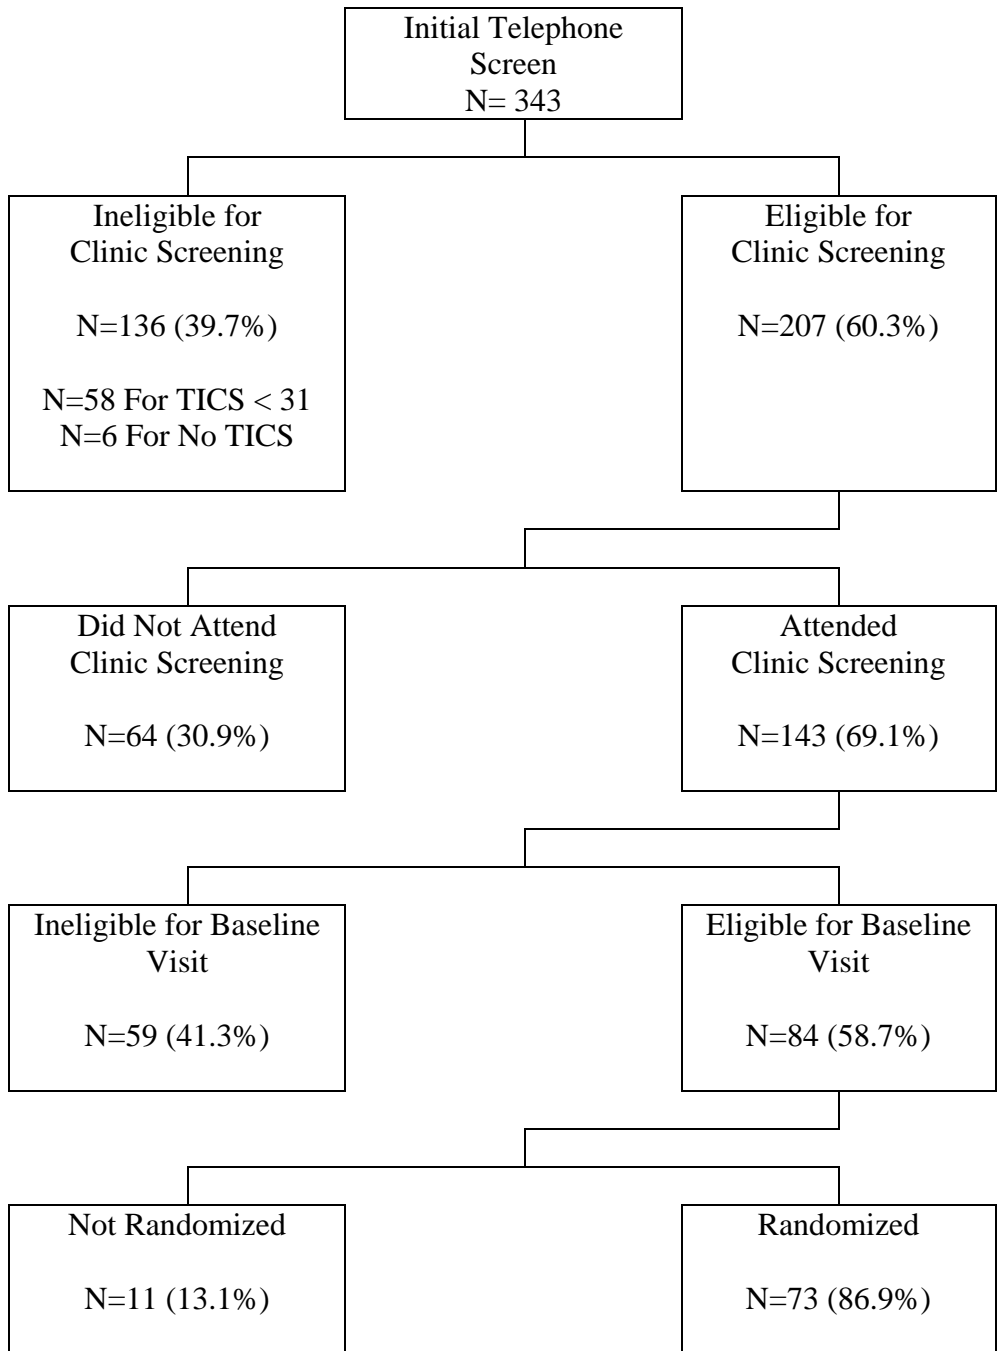

TICS: Telephone Interview for Cognitive Status

Supplement: MOESM1 [file 9439950]
